# Supplementary material for: A New Quinazolinone Alkaloid along with Known Compounds with Seed-Germination-Promoting Activity from Rhodiola tibetica Endophytic Fungus Penicillium sp. HJT-A-6
Source: MDPI journal article supplement (doi:10.3390/molecules29092112), 2024-05-02
Supplement: s1 [file s1]

# A New Quinazolinone Alkaloid along with Known Compounds with Seed-Germination-Promoting Activity from *Rhodiola tibetica* Endophytic Fungus *Penicillium* sp. HJT-A-6

Dongliang Xiao <sup>1,†</sup>, Yan Wang <sup>1,†</sup>, Congcong Gao <sup>1</sup>, Xuemei Zhang <sup>1</sup>, Weixing Feng <sup>1</sup>, Xuan Lu <sup>1,\*</sup>,  
Baomin Feng <sup>1,\*</sup>

<sup>1</sup> College of life and health, Dalian University, Dalian 116622, China; xdl120318@163.com (D.X.); wangyan\_9910@163.com (Y.W.); gcc1125@163.com (C.G.); zxuemei2024@163.com (X.Z.); fwx\_0910@163.com (W.F.);

\* Correspondence: luxuan\_232@163.com (X.L.); fbmdlu@163.com (B.F.)

<sup>†</sup> These authors contributed equally to this work.

## Supplementary Materials

### Table of Contents

|                                                                                                                    |           |
|--------------------------------------------------------------------------------------------------------------------|-----------|
| <b>Figure S1.</b> Positive mode HRESIMS spectrum of <b>1</b>                                                       | <b>3</b>  |
| <b>Figure S2.</b> UV spectrum of <b>1</b>                                                                          | <b>3</b>  |
| <b>Figure S3.</b> <sup>1</sup> H NMR (DMSO- <i>d</i> <sub>6</sub> , 500 MHz) spectrum of <b>1</b>                  | <b>4</b>  |
| <b>Figure S4.</b> <sup>1</sup> H NMR (DMSO- <i>d</i> <sub>6</sub> , 500 MHz) spectrum of <b>1a</b>                 | <b>4</b>  |
| <b>Figure S5.</b> <sup>1</sup> H NMR (DMSO- <i>d</i> <sub>6</sub> , 500 MHz) spectrum of <b>1b</b>                 | <b>5</b>  |
| <b>Figure S6.</b> <sup>13</sup> C NMR (DMSO- <i>d</i> <sub>6</sub> , 125 MHz) spectrum of <b>1</b>                 | <b>5</b>  |
| <b>Figure S7.</b> HSQC (DMSO- <i>d</i> <sub>6</sub> , 500 MHz) spectrum of <b>1</b>                                | <b>6</b>  |
| <b>Figure S8.</b> HMBC (DMSO- <i>d</i> <sub>6</sub> , 500 MHz) spectrum of <b>1</b>                                | <b>6</b>  |
| <b>Figure S9.</b> <sup>1</sup> H- <sup>1</sup> H COSY (DMSO- <i>d</i> <sub>6</sub> , 500 MHz) spectrum of <b>1</b> | <b>7</b>  |
| <b>Figure S10.</b> NOESY (DMSO- <i>d</i> <sub>6</sub> , 500 MHz) spectrum of <b>1</b>                              | <b>7</b>  |
| <b>Figure S11.</b> CD spectrum of <b>1</b>                                                                         | <b>8</b>  |
| <b>Figure S12.</b> <sup>1</sup> H NMR (DMSO- <i>d</i> <sub>6</sub> , 500 MHz) spectrum of <b>2</b>                 | <b>9</b>  |
| <b>Figure S13.</b> <sup>13</sup> C NMR (DMSO- <i>d</i> <sub>6</sub> , 125 MHz) spectrum of <b>2</b>                | <b>9</b>  |
| <b>Figure S14.</b> <sup>1</sup> H NMR (DMSO- <i>d</i> <sub>6</sub> , 500 MHz) spectrum of <b>3</b>                 | <b>10</b> |
| <b>Figure S15.</b> <sup>13</sup> C NMR (DMSO- <i>d</i> <sub>6</sub> , 125 MHz) spectrum of <b>3</b>                | <b>10</b> |
| <b>Figure S16.</b> <sup>1</sup> H NMR (DMSO- <i>d</i> <sub>6</sub> , 500 MHz) spectrum of <b>4</b>                 | <b>11</b> |
| <b>Figure S17.</b> <sup>13</sup> C NMR (DMSO- <i>d</i> <sub>6</sub> , 125 MHz) spectrum of <b>4</b>                | <b>11</b> |
| <b>Figure S18.</b> <sup>1</sup> H NMR (DMSO- <i>d</i> <sub>6</sub> , 500 MHz) spectrum of <b>5a/5b</b>             | <b>12</b> |
| <b>Figure S19.</b> <sup>13</sup> C NMR (DMSO- <i>d</i> <sub>6</sub> , 125 MHz) spectrum of <b>5a/5b</b>            | <b>12</b> |
| <b>Figure S20.</b> <sup>1</sup> H NMR (DMSO- <i>d</i> <sub>6</sub> , 500 MHz) spectrum of <b>6</b>                 | <b>13</b> |
| <b>Figure S21.</b> <sup>13</sup> C NMR (DMSO- <i>d</i> <sub>6</sub> , 125 MHz) spectrum of <b>6</b>                | <b>13</b> |
| <b>Figure S22.</b> <sup>1</sup> H NMR (DMSO- <i>d</i> <sub>6</sub> , 500 MHz) spectrum of <b>7</b>                 | <b>14</b> |
| <b>Figure S23.</b> <sup>13</sup> C NMR (DMSO- <i>d</i> <sub>6</sub> , 125 MHz) spectrum of <b>7</b>                | <b>14</b> |
| <b>Figure S24.</b> <sup>1</sup> H NMR (DMSO- <i>d</i> <sub>6</sub> , 500 MHz) spectrum of <b>8</b>                 | <b>15</b> |
| <b>Figure S25.</b> <sup>13</sup> C NMR (DMSO- <i>d</i> <sub>6</sub> , 125 MHz) spectrum of <b>8</b>                | <b>15</b> |
| <b>Figure S26.</b> <sup>1</sup> H NMR (DMSO- <i>d</i> <sub>6</sub> , 500 MHz) spectrum of <b>9</b>                 | <b>16</b> |
| <b>Figure S27.</b> <sup>1</sup> H NMR (DMSO- <i>d</i> <sub>6</sub> , 500 MHz) spectrum of <b>10</b>                | <b>17</b> |
| <b>Figure S28.</b> <sup>13</sup> C NMR (DMSO- <i>d</i> <sub>6</sub> , 125 MHz) spectrum of <b>10</b>               | <b>17</b> |
| <b>Figure S29.</b> <sup>1</sup> H NMR (DMSO- <i>d</i> <sub>6</sub> , 500 MHz) spectrum of <b>11</b>                | <b>18</b> |
| <b>Figure S30.</b> <sup>13</sup> C NMR (DMSO- <i>d</i> <sub>6</sub> , 125 MHz) spectrum of <b>11</b>               | <b>18</b> |
| <b>Figure S31.</b> <sup>1</sup> H NMR (DMSO- <i>d</i> <sub>6</sub> , 500 MHz) spectrum of <b>12</b>                | <b>19</b> |
| <b>Figure S32.</b> <sup>13</sup> C NMR (DMSO- <i>d</i> <sub>6</sub> , 125 MHz) spectrum of <b>12</b>               | <b>19</b> |

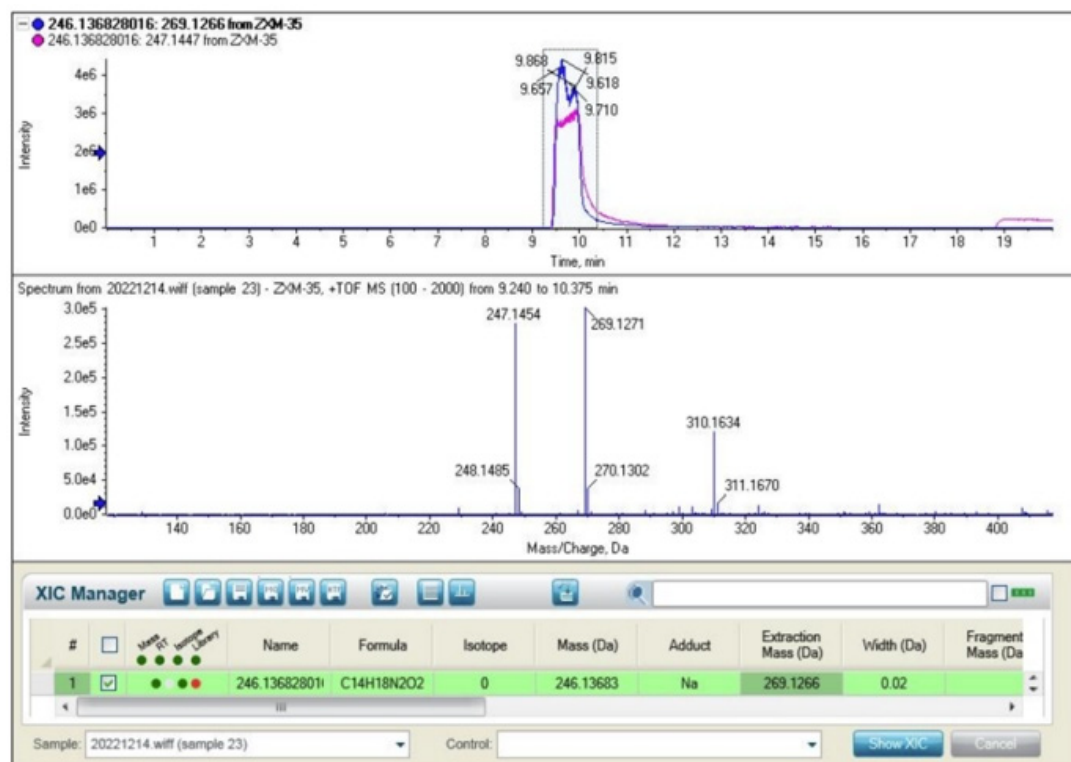

Figure S1. Positive mode HRESIMS spectrum of 1

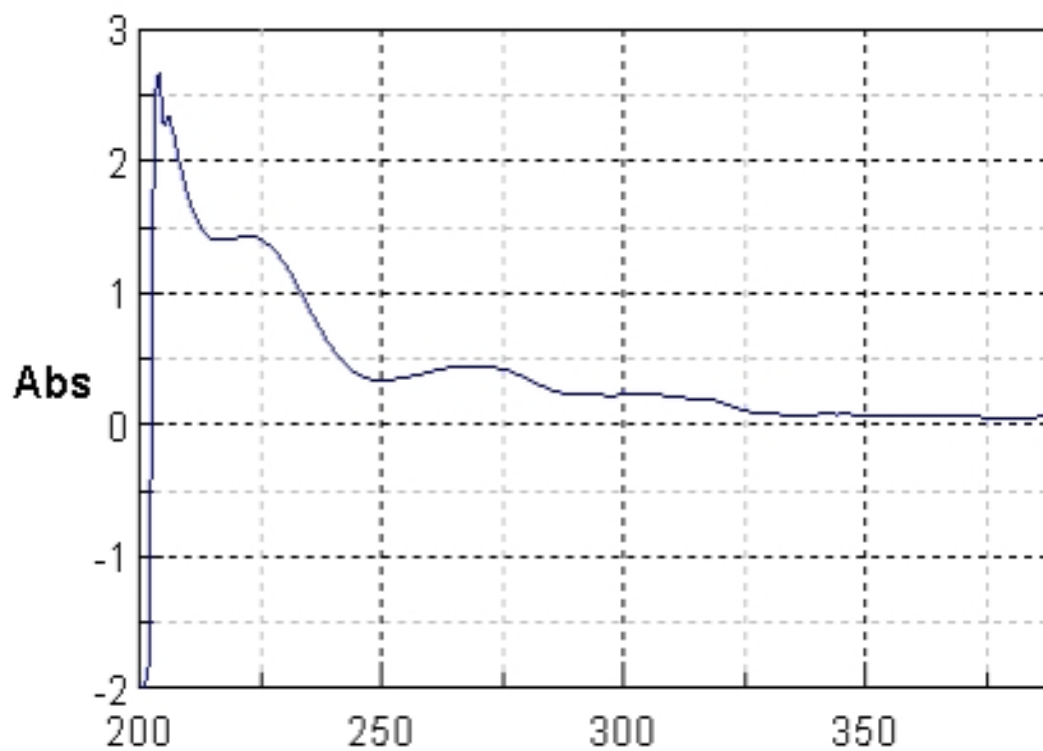

Figure S2. UV spectrum of 1

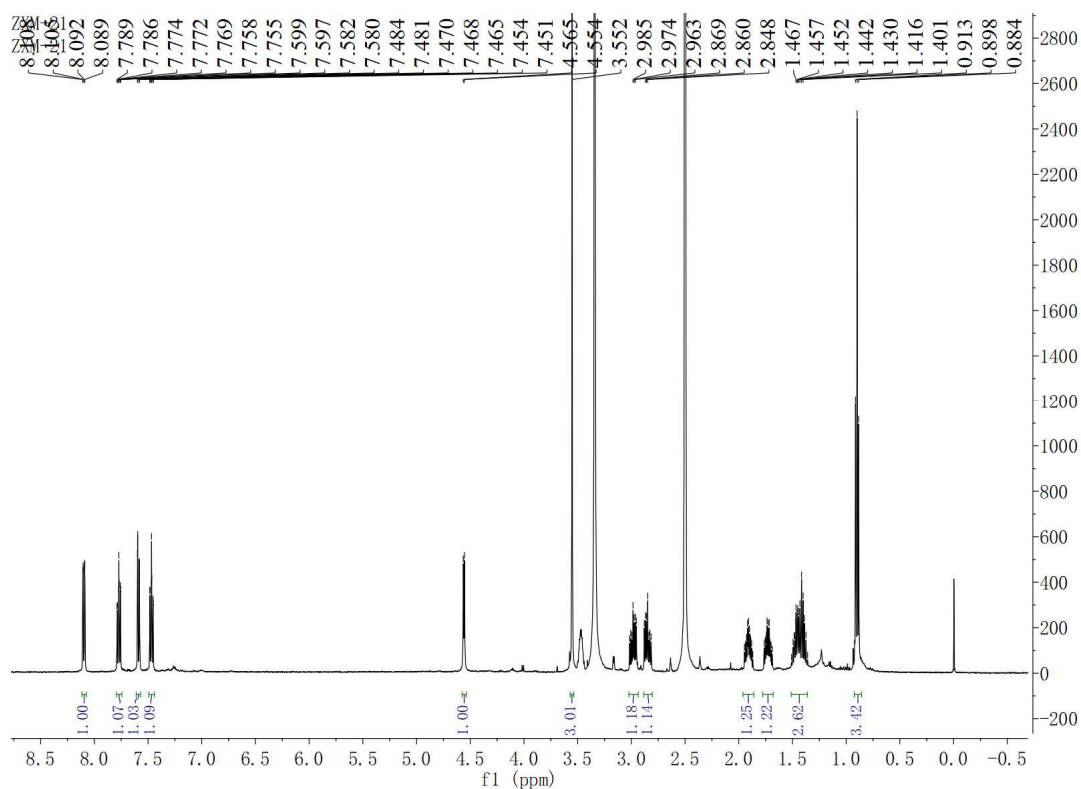

Figure S3. <sup>1</sup>H NMR (DMSO-*d*<sub>6</sub>, 500 MHz) spectrum of **1**

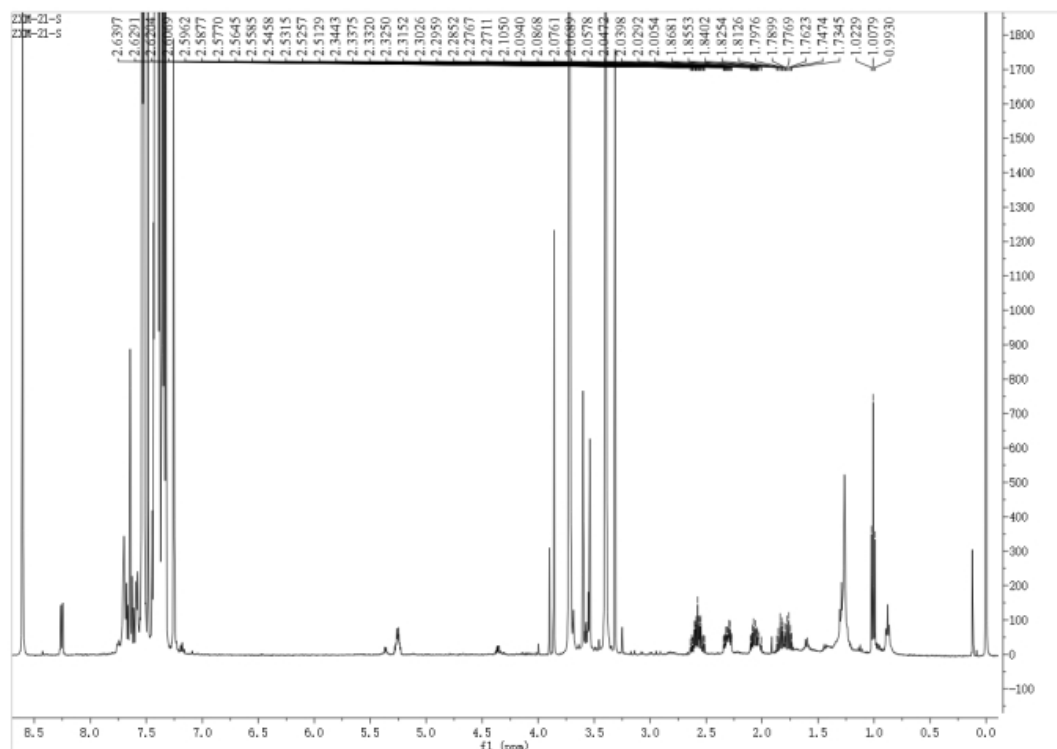

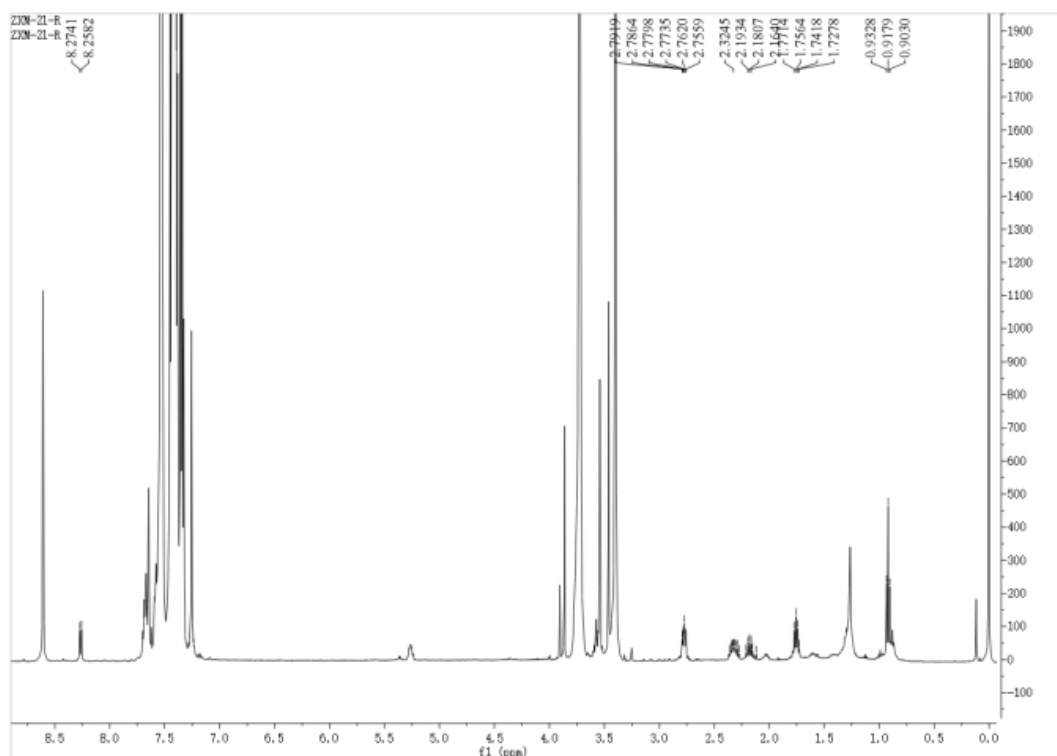

**Figure S5.**  $^1\text{H}$  NMR ( $\text{DMSO}-d_6$ , 500 MHz) spectrum of **1b**

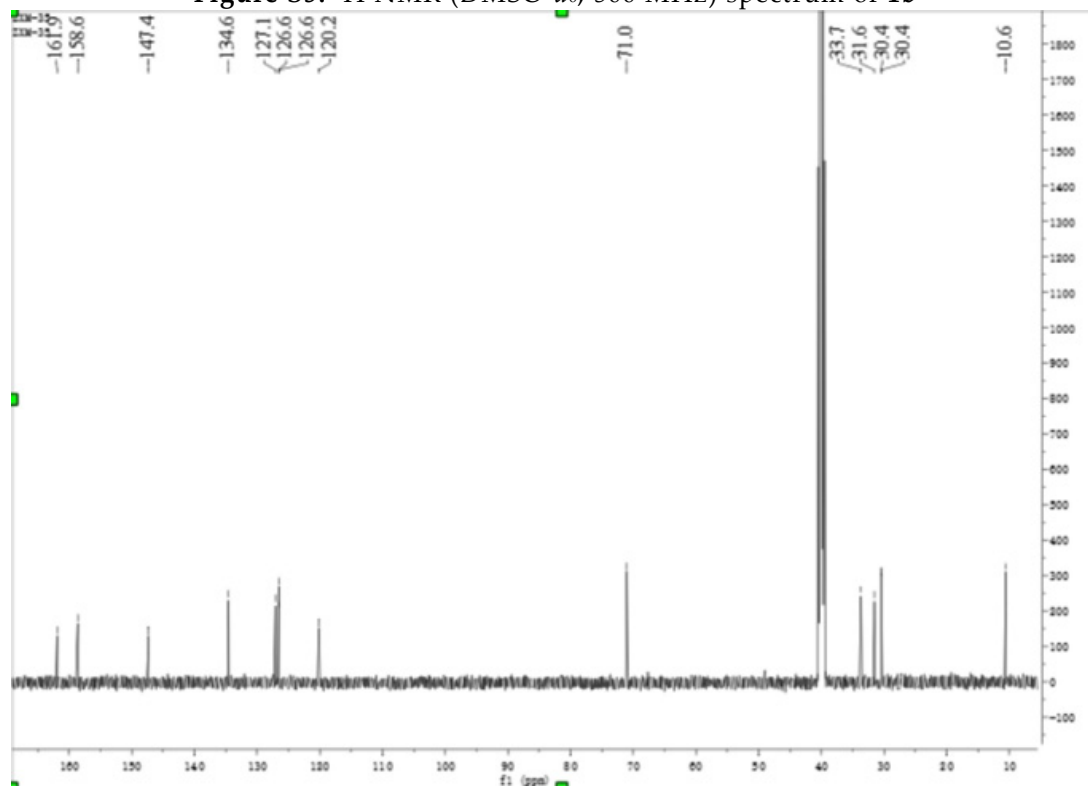

**Figure S6.**  $^{13}\text{C}$  NMR ( $\text{DMSO}-d_6$ , 125 MHz) spectrum of **1**

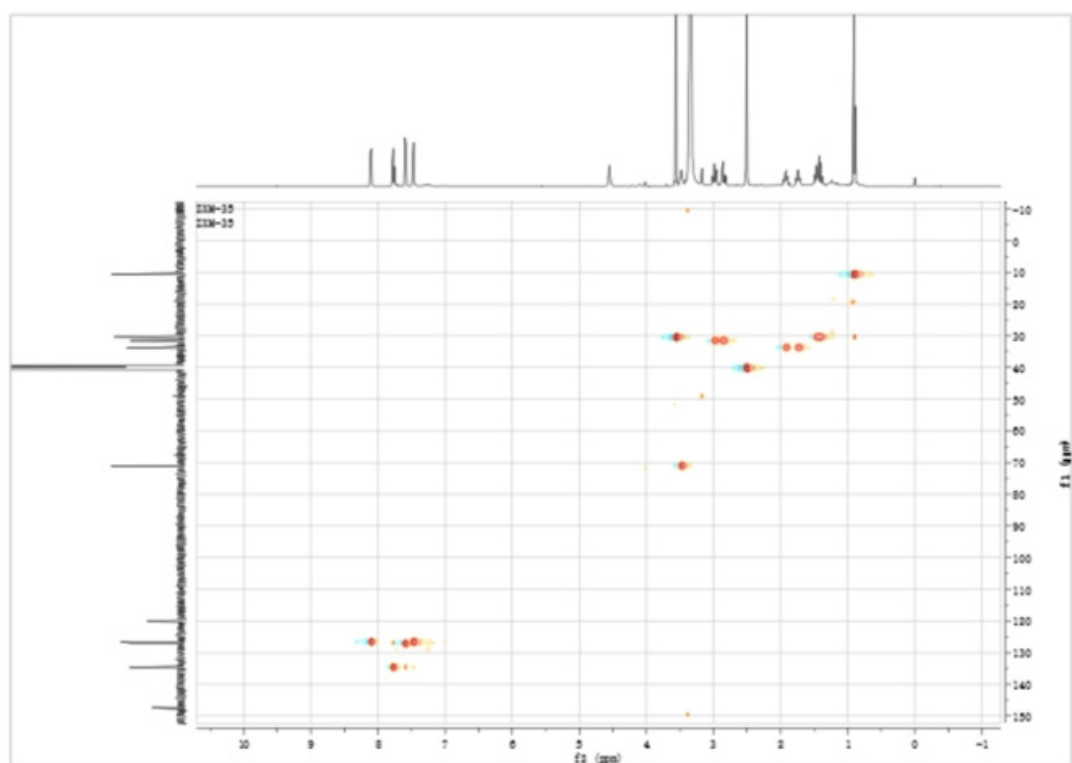

Figure S7. HSQC (DMSO-*d*<sub>6</sub>, 500 MHz) spectrum of **1**

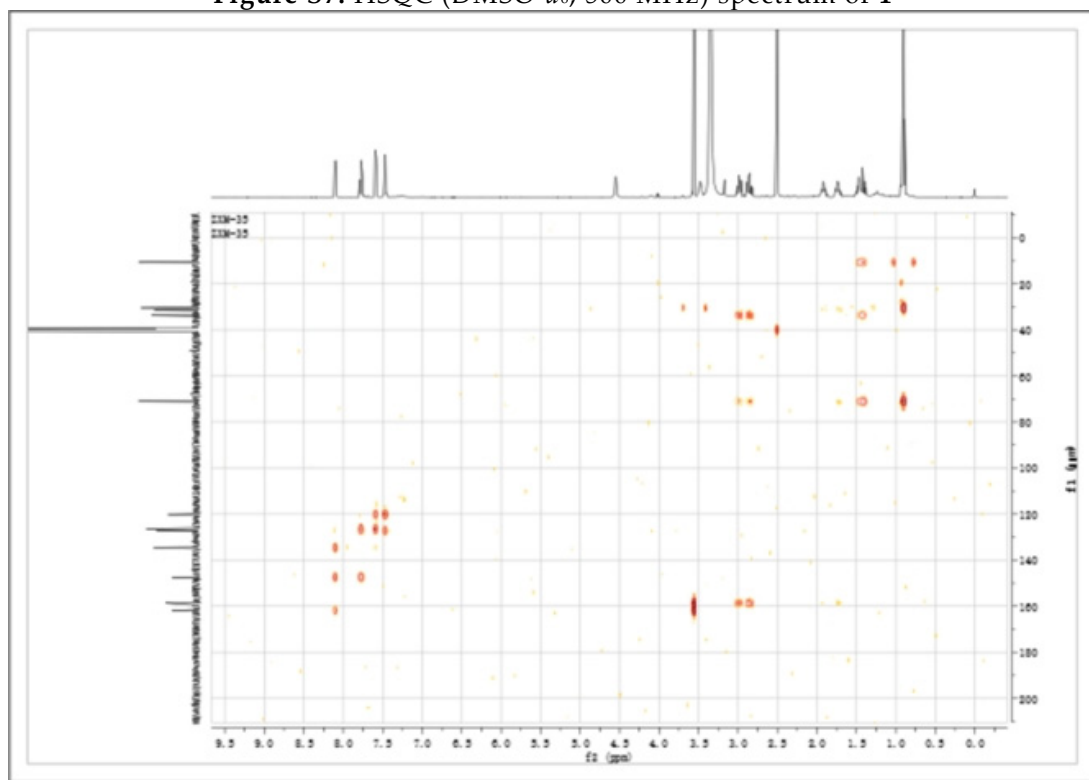

Figure S8. HMBC (DMSO-*d*<sub>6</sub>, 500 MHz) spectrum of **1**

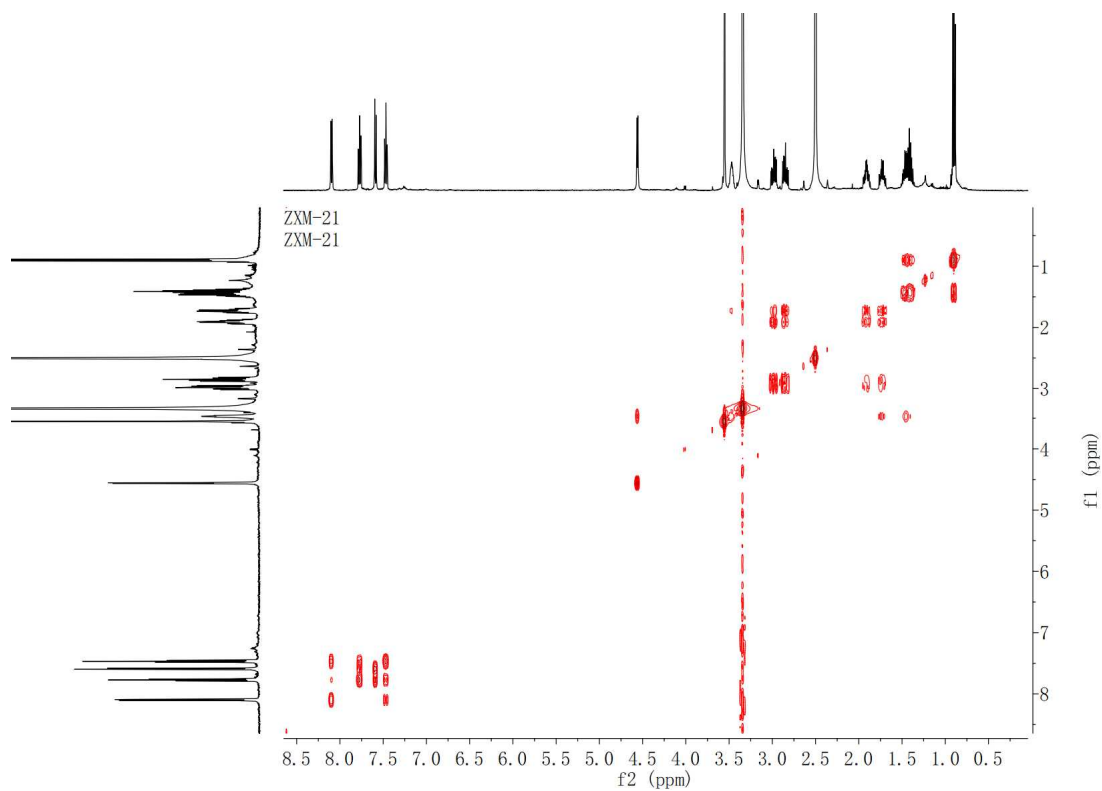

**Figure S9.**  $^1\text{H}$ - $^1\text{H}$  COSY (DMSO- $d_6$ , 500 MHz) spectrum of **1**

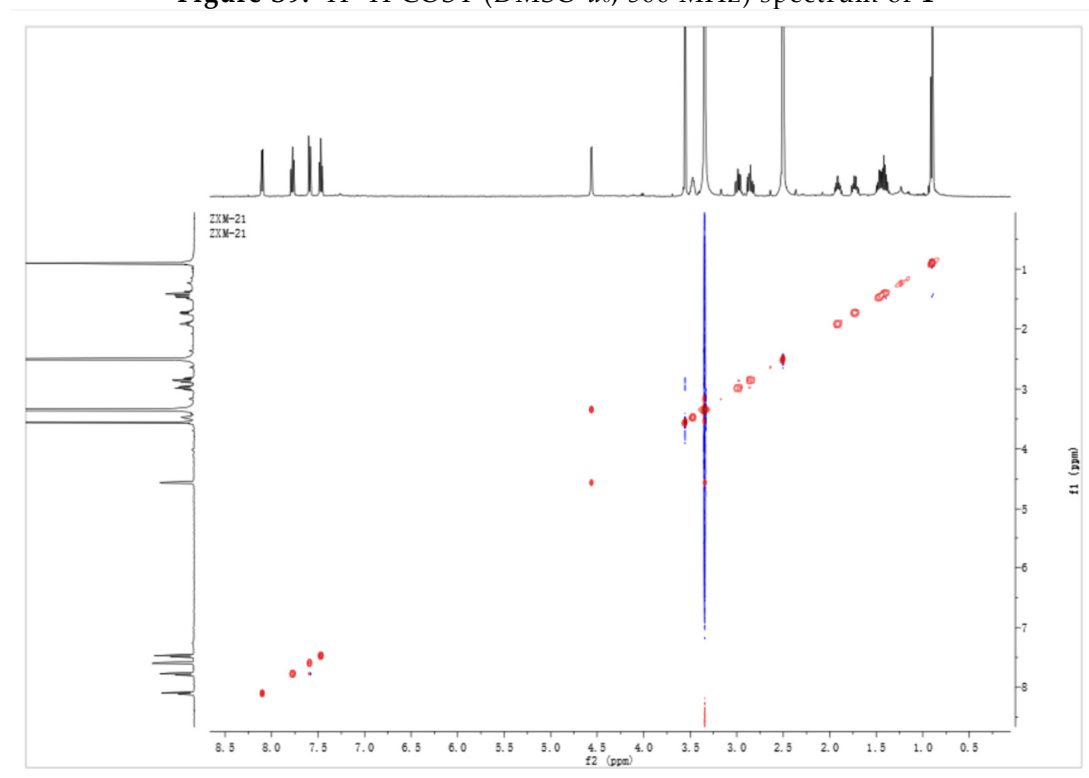

**Figure S10.** NOESY (DMSO- $d_6$ , 500 MHz) spectrum of **1**

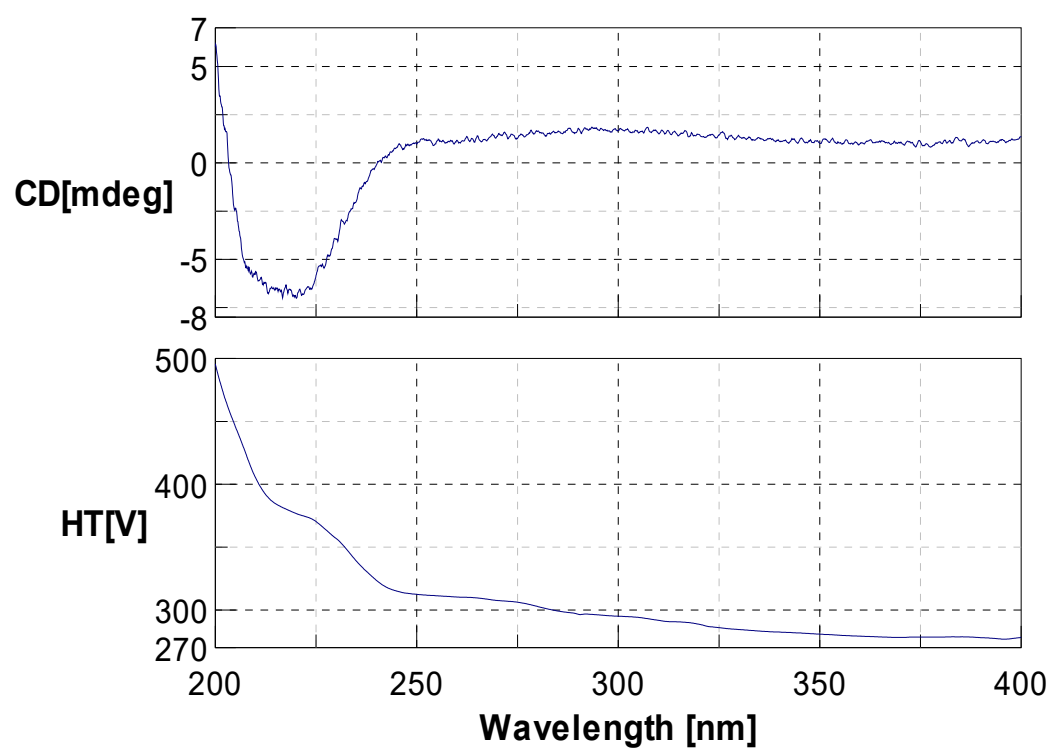

Figure S11. CD spectrum of **1**



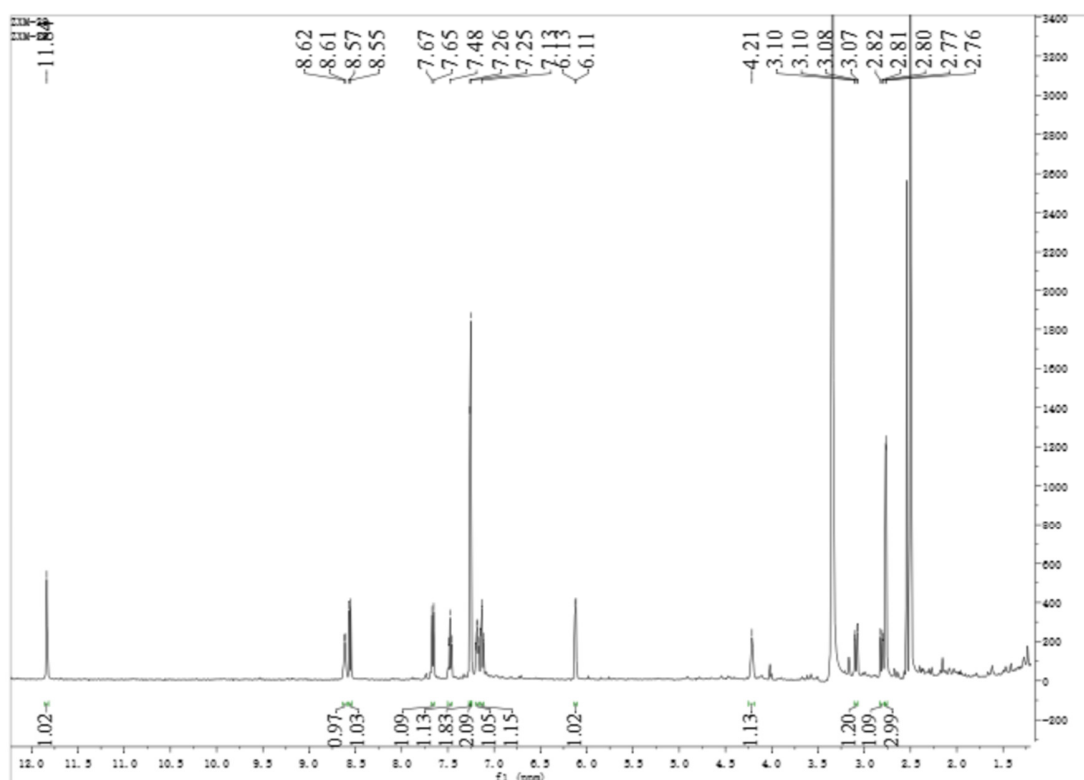

Figure S12. <sup>1</sup>H NMR (DMSO-*d*<sub>6</sub>, 500 MHz) spectrum of **2**

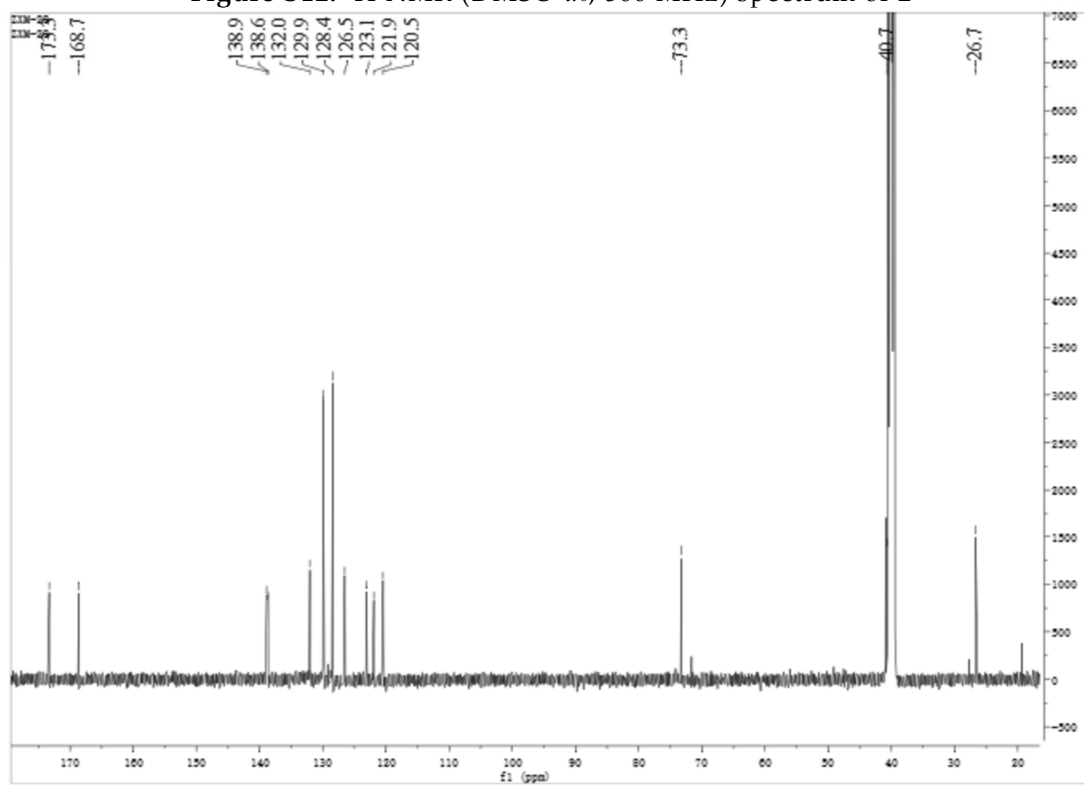

Figure S13. <sup>13</sup>C NMR (DMSO-*d*<sub>6</sub>, 125 MHz) spectrum of **2**

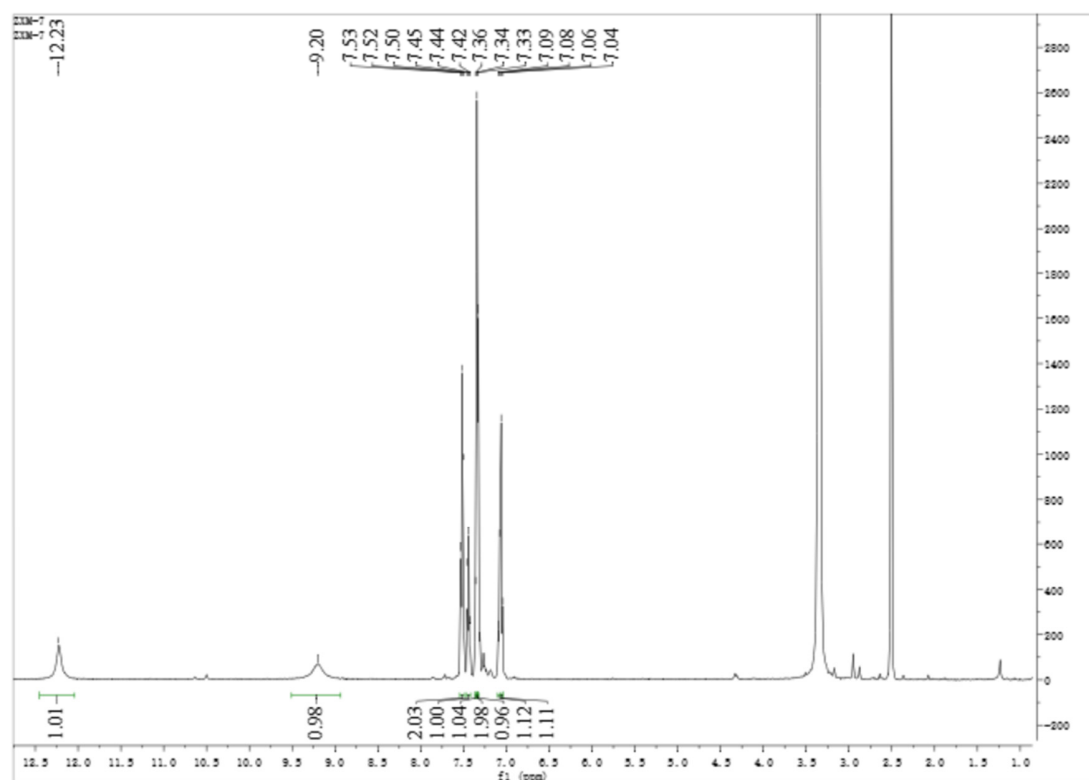

**Figure S14.** <sup>1</sup>H NMR (DMSO-*d*<sub>6</sub>, 500 MHz) spectrum of **3**

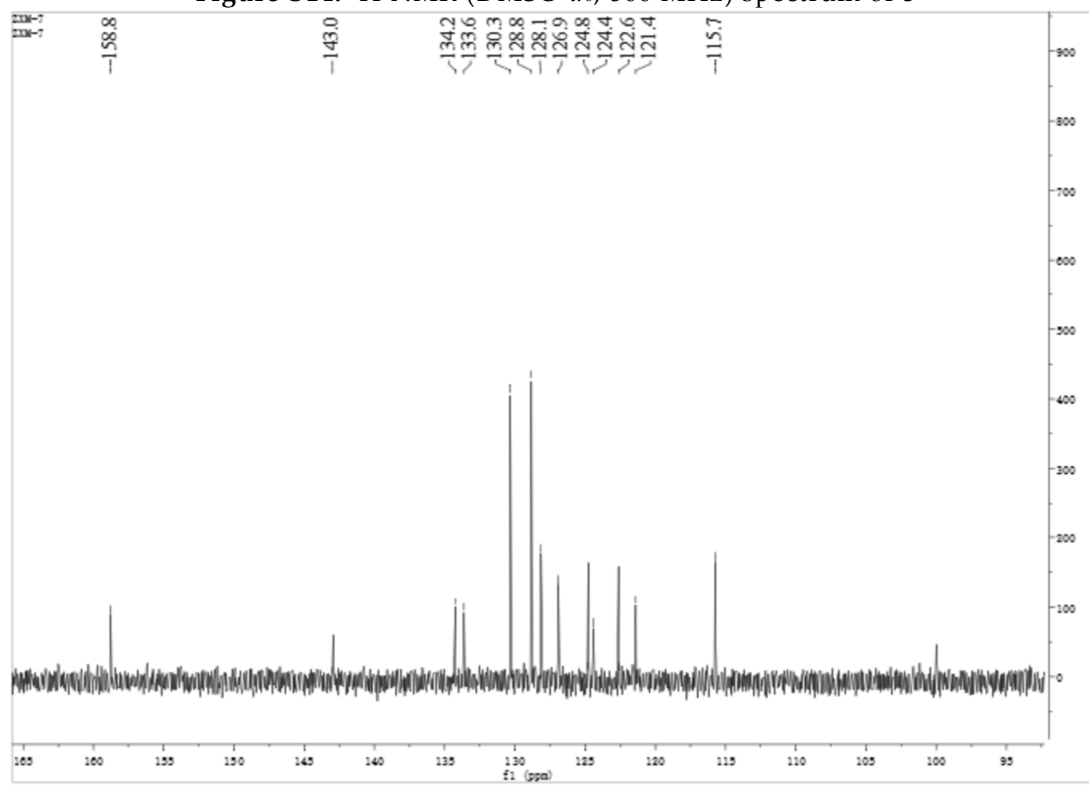

**Figure S15.** <sup>13</sup>C NMR (DMSO-*d*<sub>6</sub>, 125 MHz) spectrum of **3**

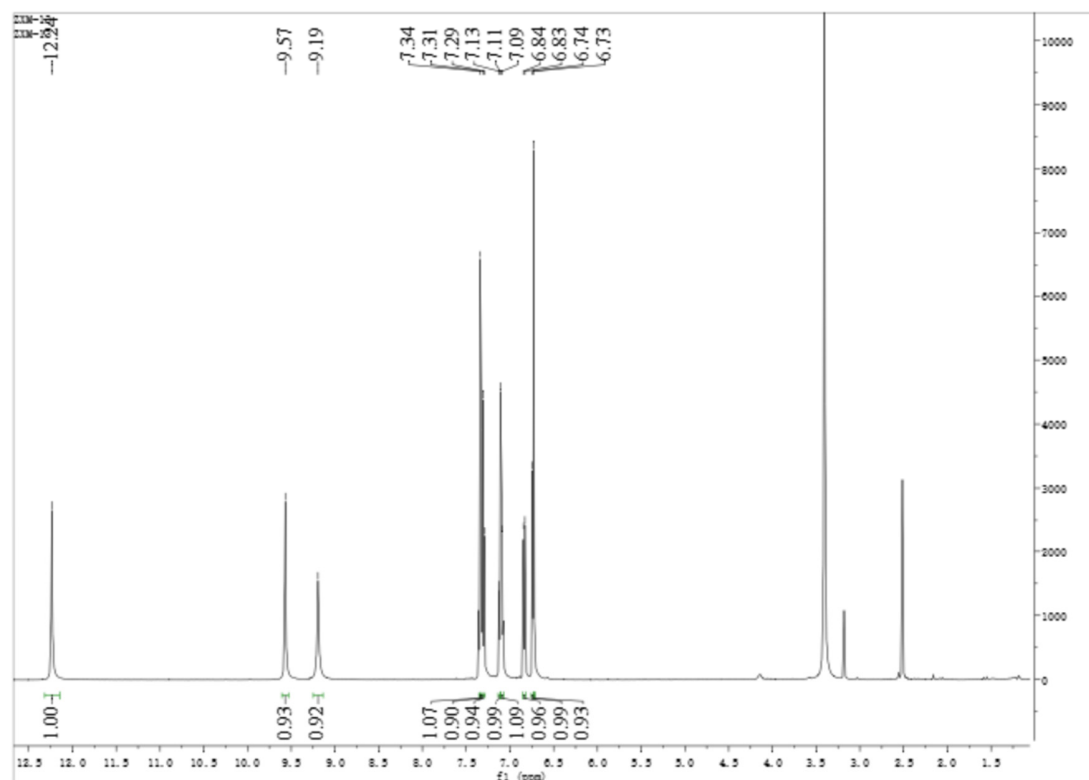

Figure S16. <sup>1</sup>H NMR (DMSO-*d*<sub>6</sub>, 500 MHz) spectrum of **4**

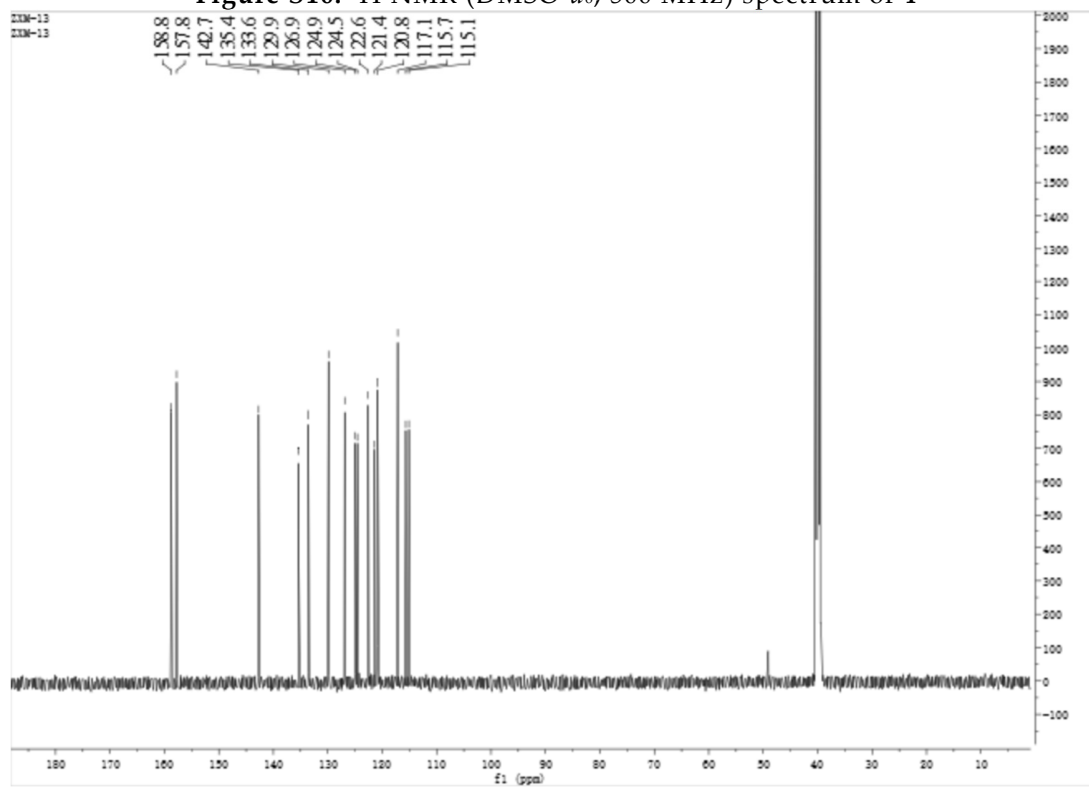

Figure S17. <sup>13</sup>C NMR (DMSO-*d*<sub>6</sub>, 125 MHz) spectrum of **4**

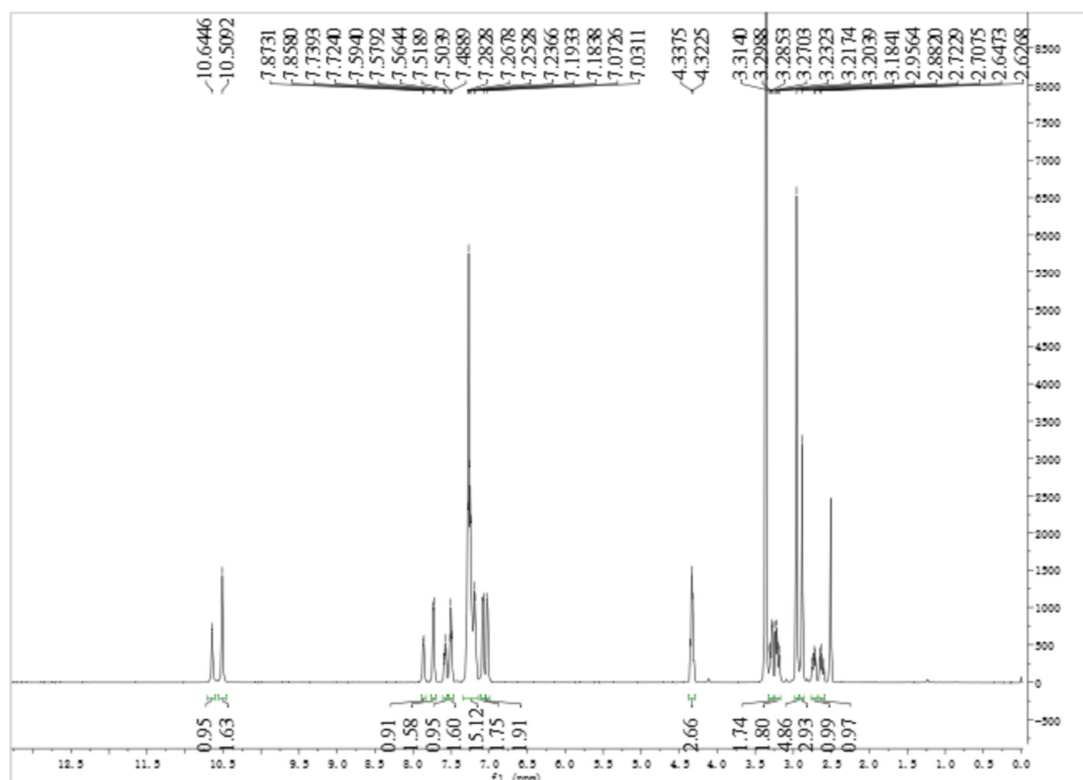

Figure S18. <sup>1</sup>H NMR (DMSO-*d*<sub>6</sub>, 500 MHz) spectrum of 5a/5b

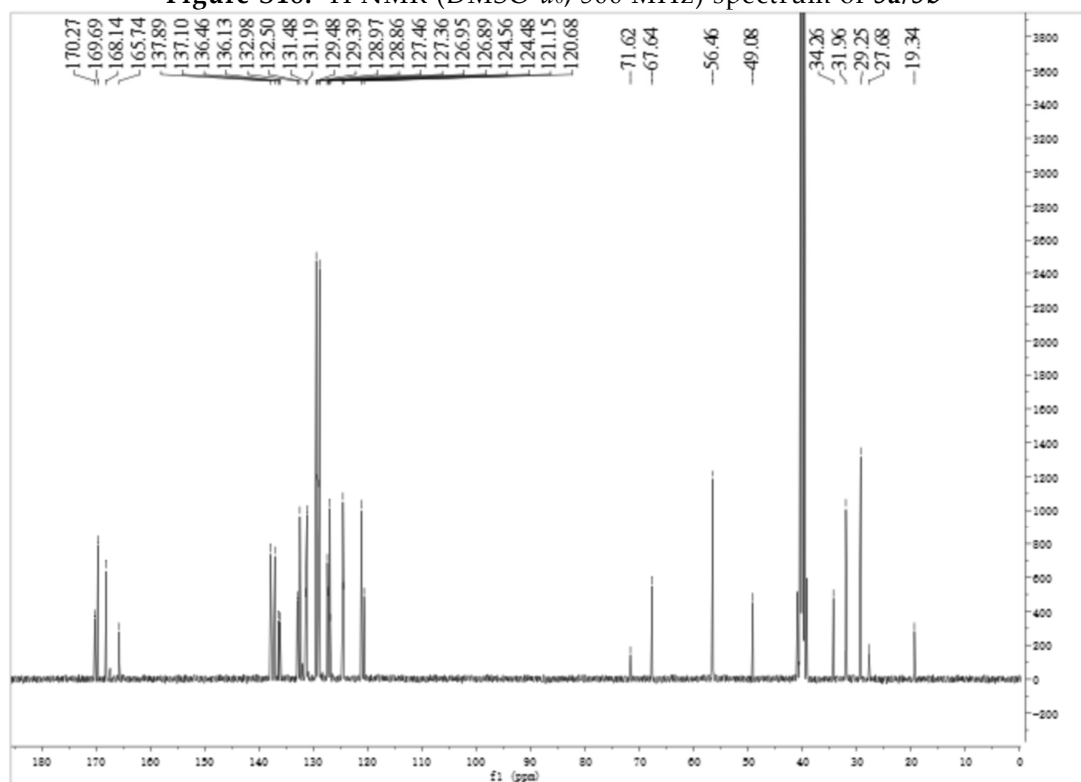

Figure S19. <sup>13</sup>C NMR (DMSO-*d*<sub>6</sub>, 125 MHz) spectrum of 5a/5b

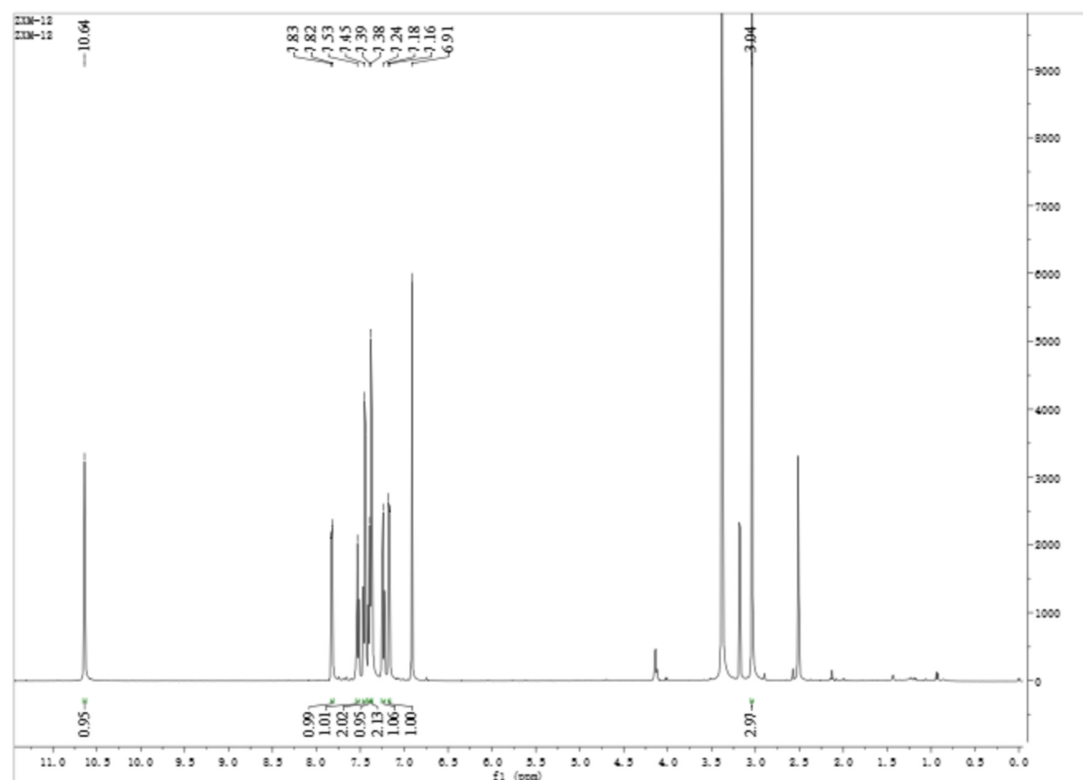

Figure S20. <sup>1</sup>H NMR (DMSO-*d*<sub>6</sub>, 500 MHz) spectrum of 6

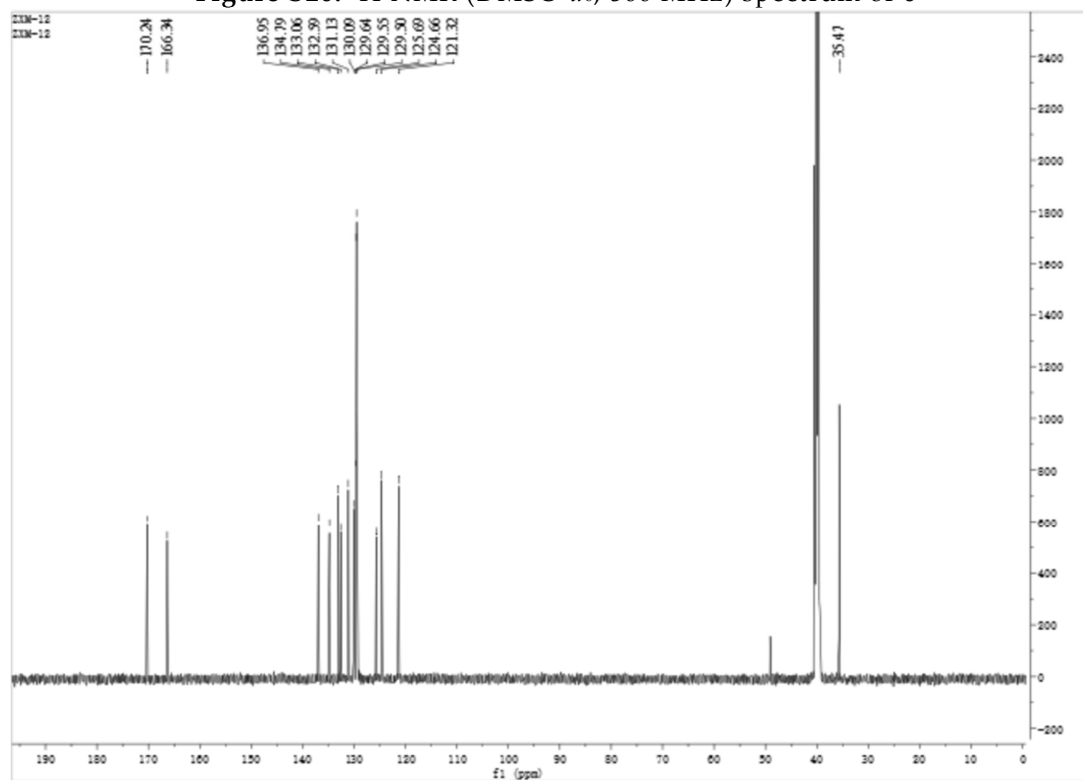

Figure S21. <sup>13</sup>C NMR (DMSO-*d*<sub>6</sub>, 125 MHz) spectrum of 6

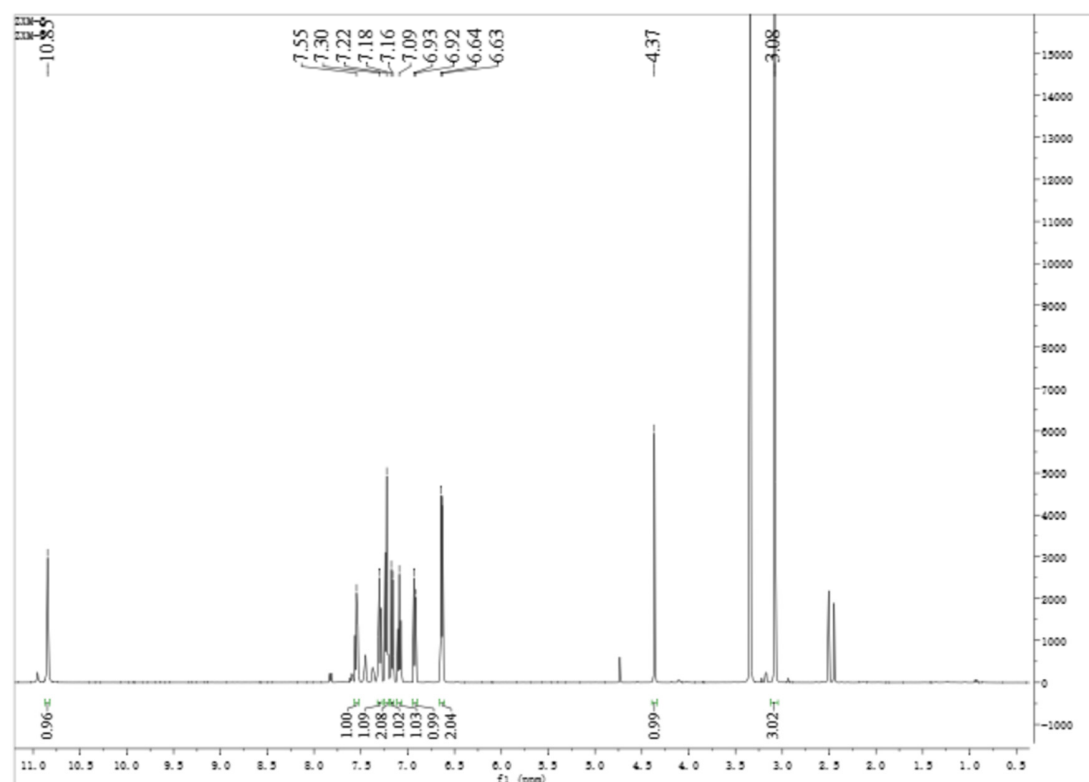

Figure S22. <sup>1</sup>H NMR (DMSO-*d*<sub>6</sub>, 500 MHz) spectrum of 7

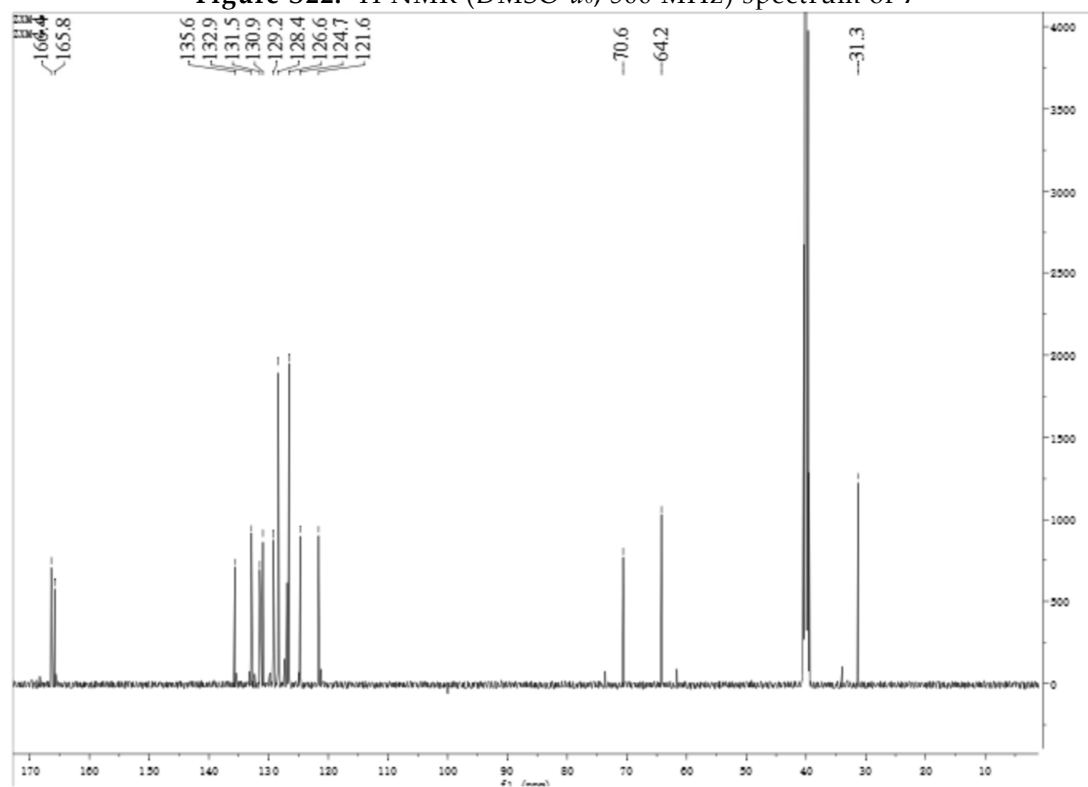

Figure S23. <sup>13</sup>C NMR (DMSO-*d*<sub>6</sub>, 125 MHz) spectrum of 7

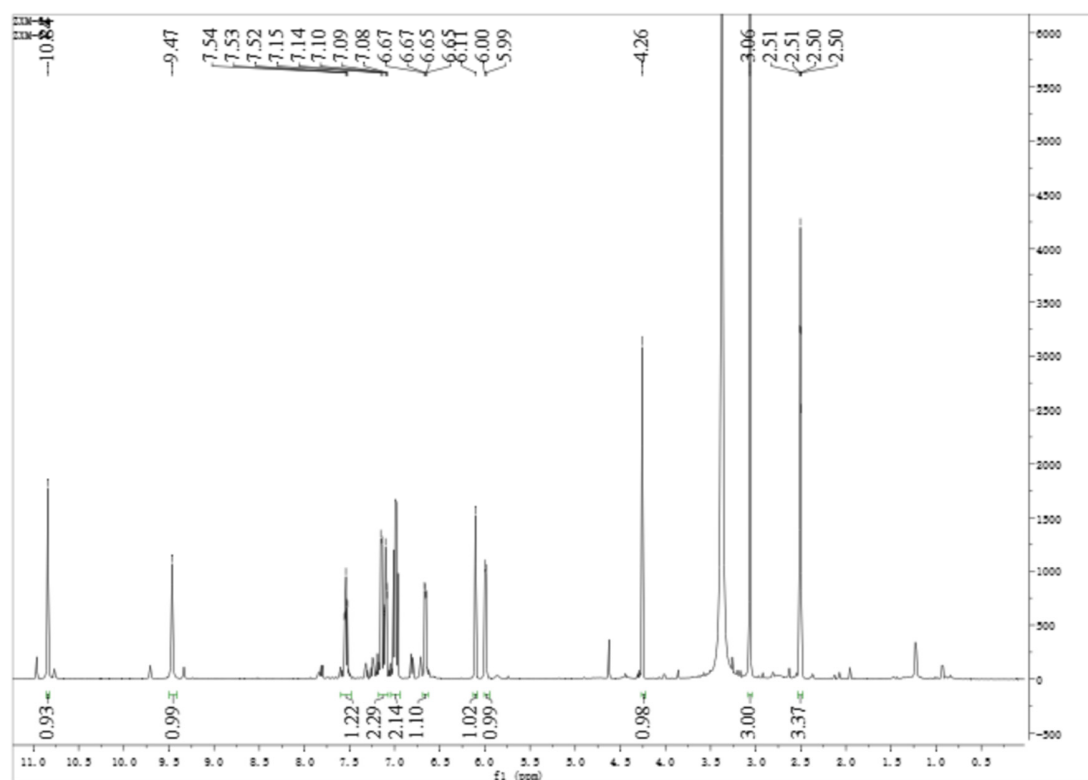

Figure S24. <sup>1</sup>H NMR (DMSO-*d*<sub>6</sub>, 500 MHz) spectrum of 8

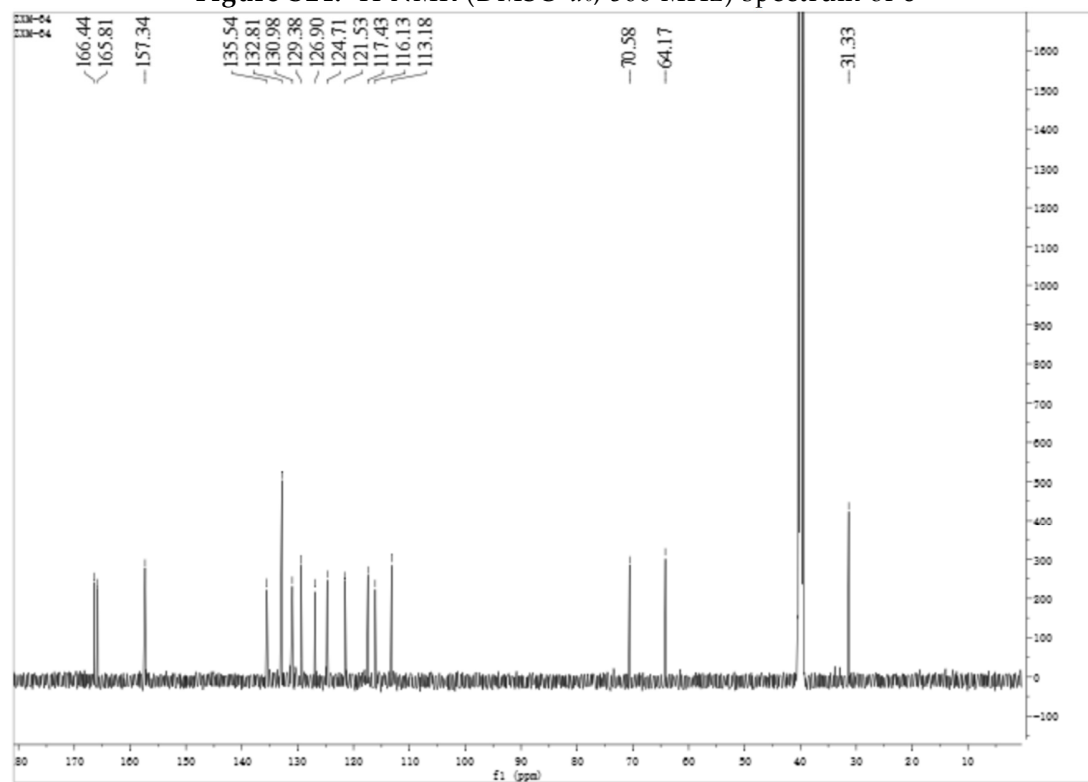

Figure S25. <sup>13</sup>C NMR (DMSO-*d*<sub>6</sub>, 125 MHz) spectrum of 8

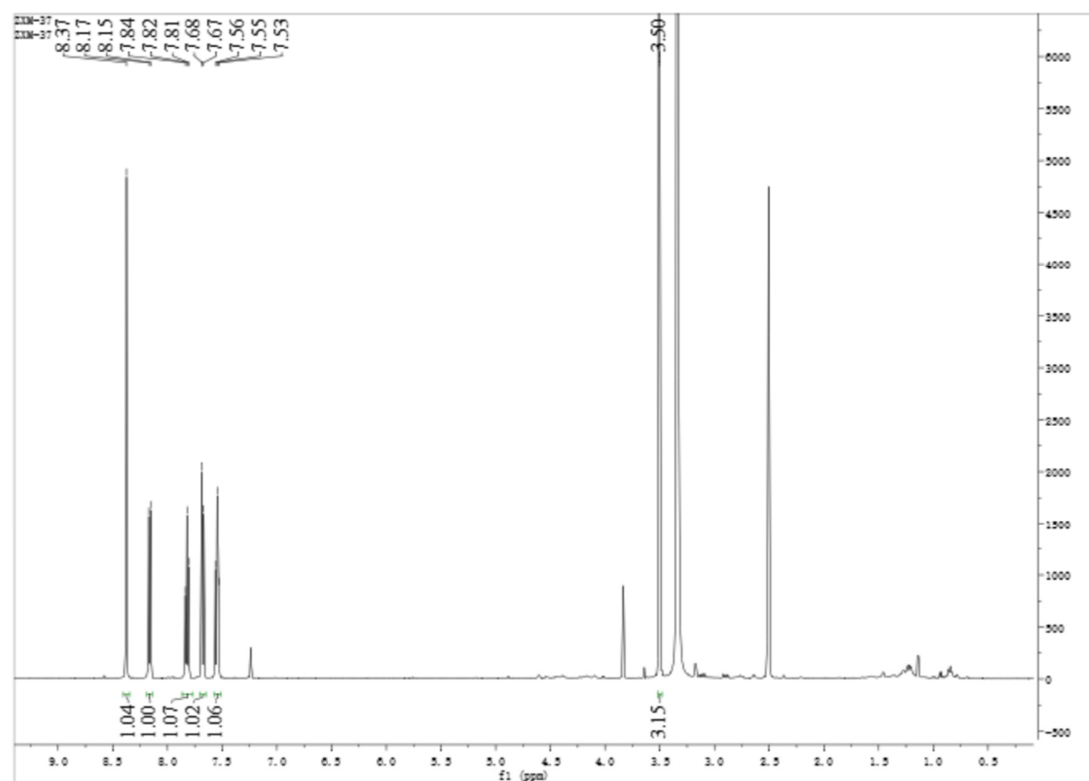

**Figure S26.**  $^1\text{H}$  NMR ( $\text{DMSO-}d_6$ , 500 MHz) spectrum of **9**



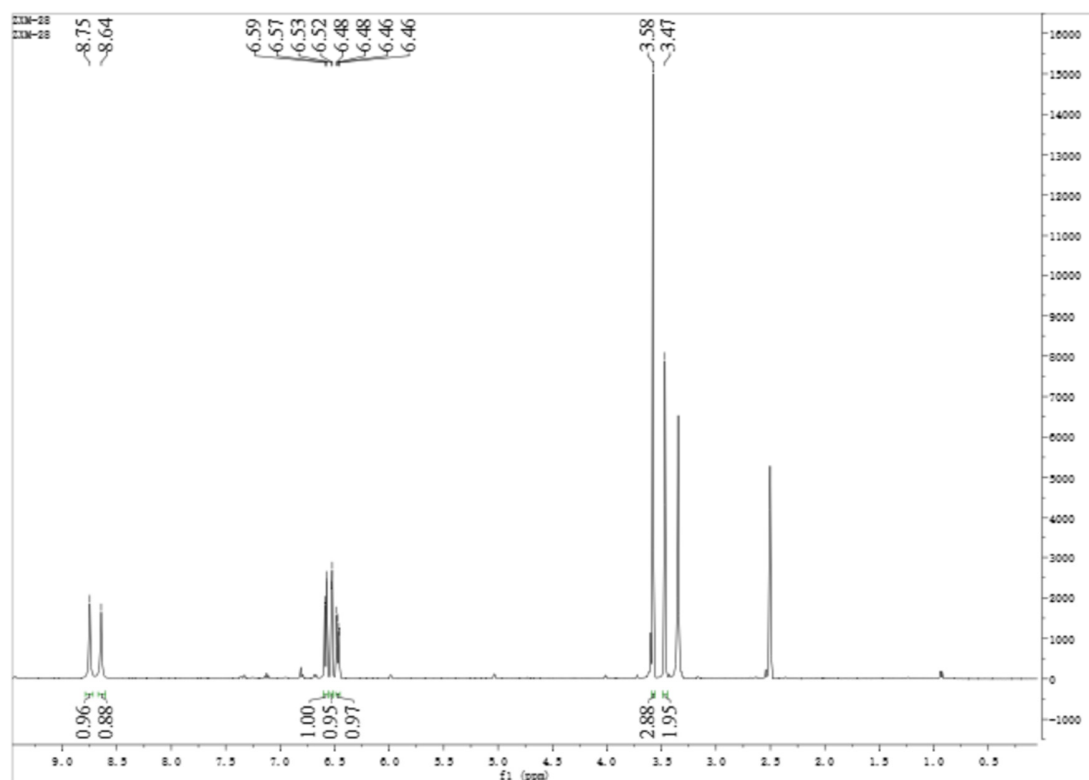

**Figure S27.** <sup>1</sup>H NMR (DMSO-*d*<sub>6</sub>, 500 MHz) spectrum of **10**

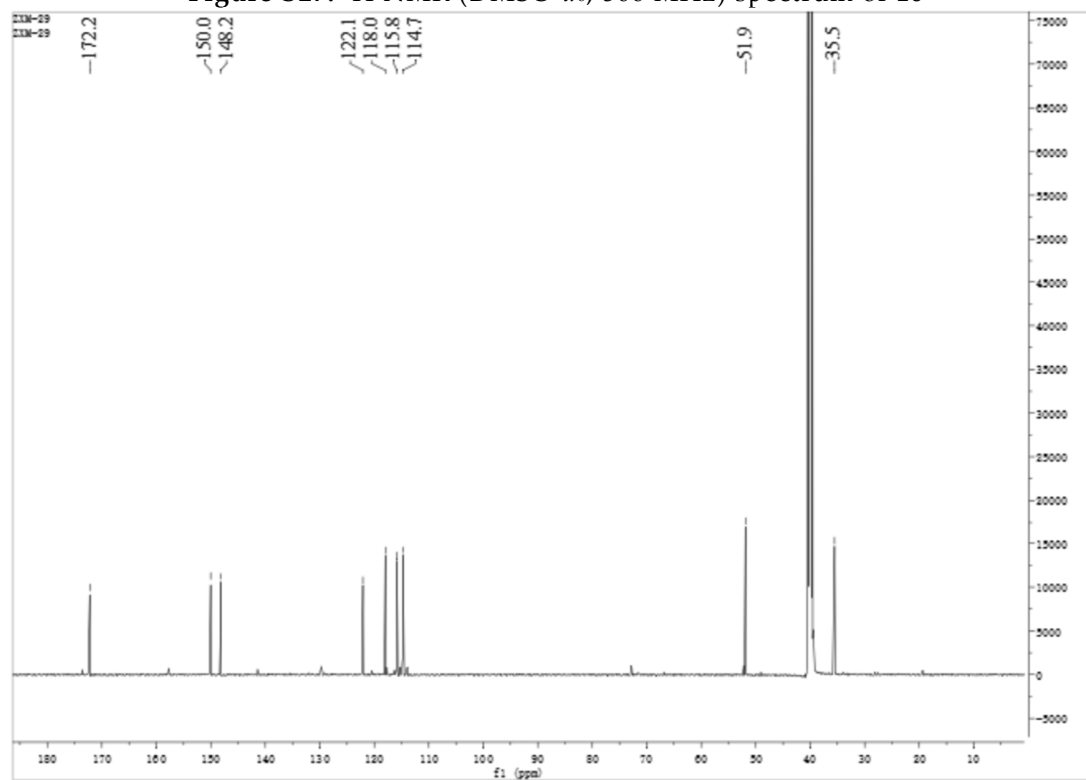

**Figure S28.** <sup>13</sup>C NMR (DMSO-*d*<sub>6</sub>, 125 MHz) spectrum of **10**

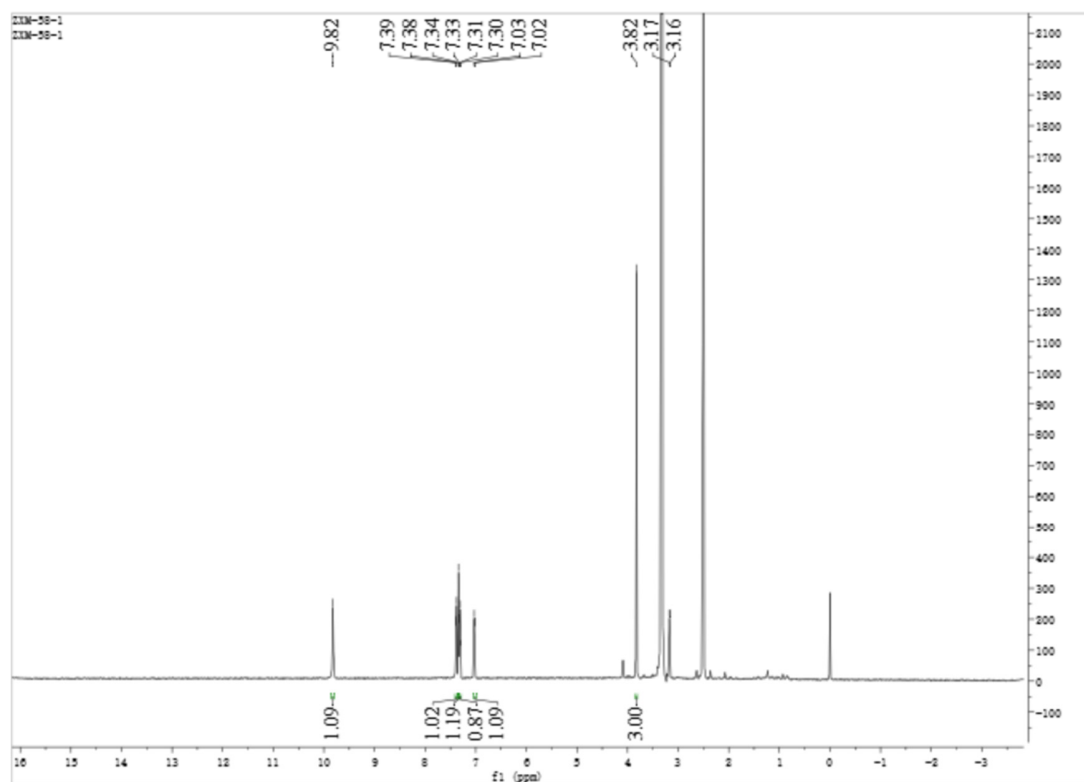

**Figure S29.** <sup>1</sup>H NMR (DMSO-*d*<sub>6</sub>, 500 MHz) spectrum of **11**

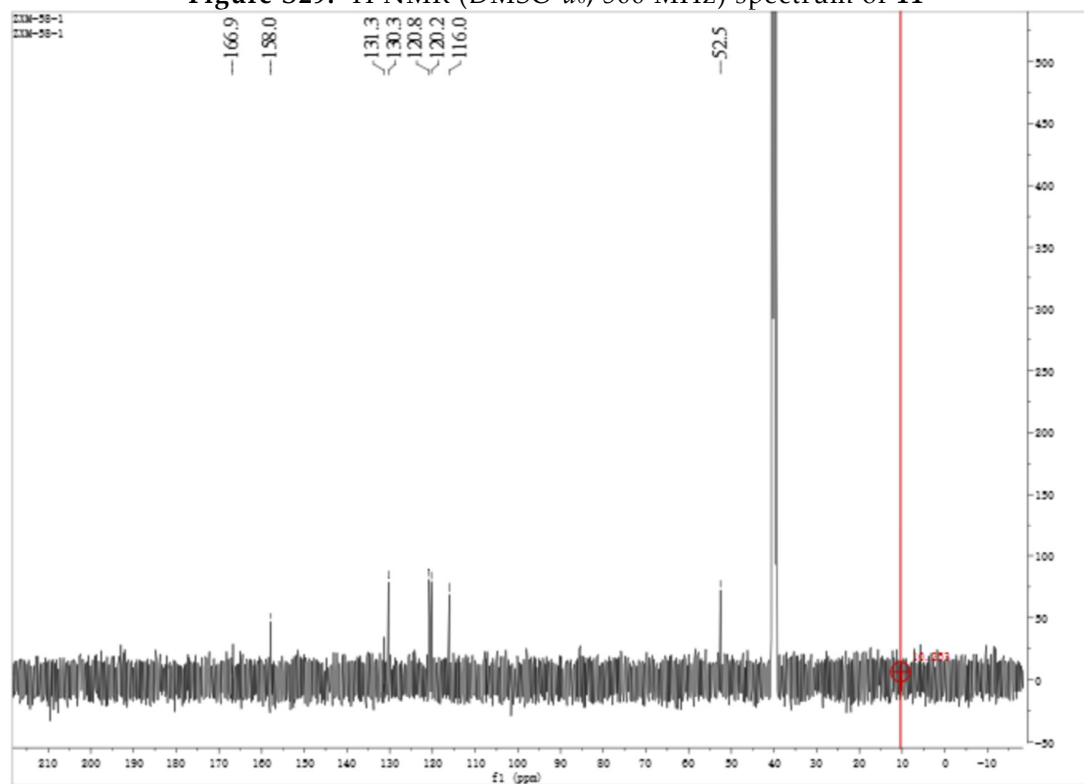

**Figure S30.** <sup>13</sup>C NMR (DMSO-*d*<sub>6</sub>, 125 MHz) spectrum of **11**

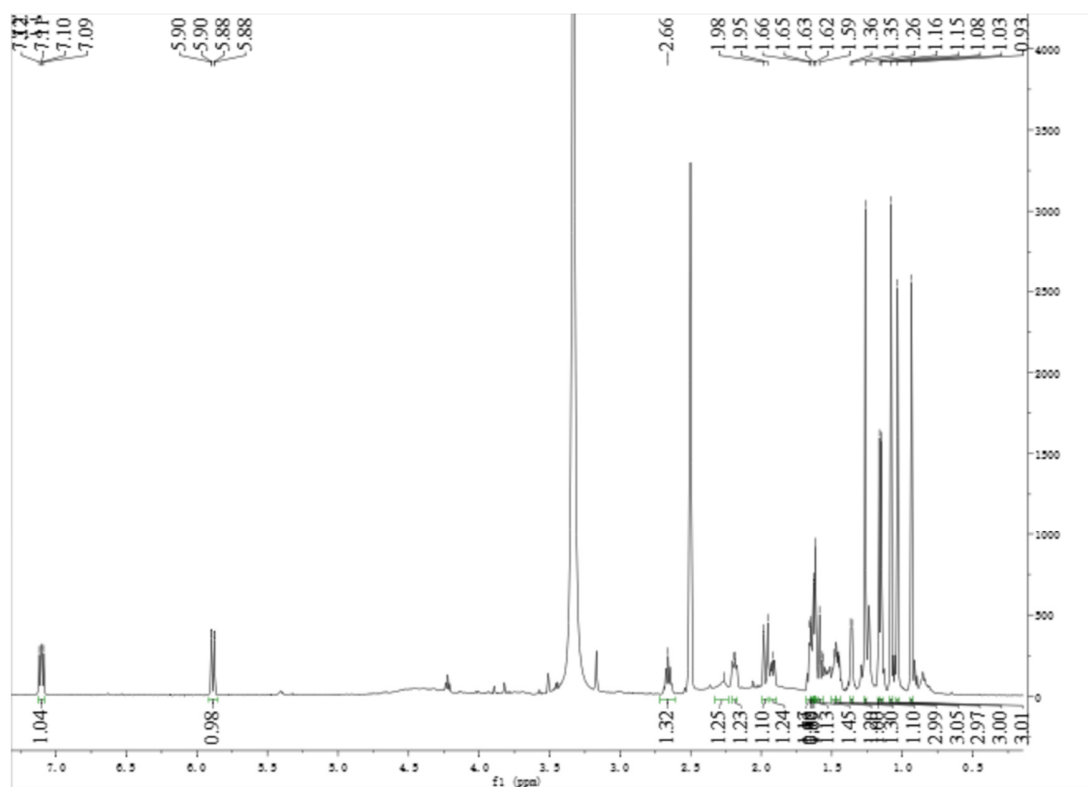

Figure S31. <sup>1</sup>H NMR (DMSO-*d*<sub>6</sub>, 500 MHz) spectrum of 12

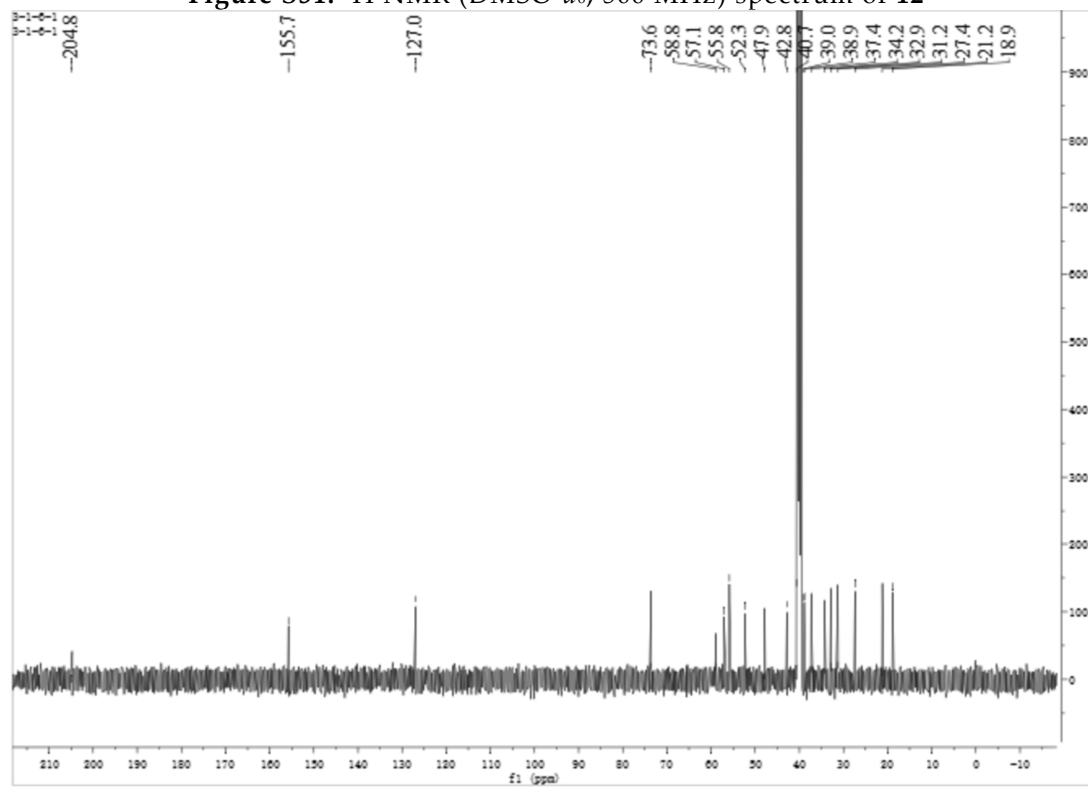

Figure S32. <sup>13</sup>C NMR (DMSO-*d*<sub>6</sub>, 125 MHz) spectrum of 12
